# Supplementary material for: The Use of Antidepressants, Anxiolytics, and Hypnotics in People with Type 2 Diabetes and Patterns Associated with Use: The Hoorn Diabetes Care System Cohort
Source: Hindawi journal article supplement (doi:10.1155/2017/5134602), 2017-01-01
Supplement: f1 [file 5134602.f1.pdf]

**Supplement**

**Table S1 Characteristics of general Dutch population stratified by antidepressant/ anxiolytics/ hypnotics use in the year 2007**

|                                                               | No antidepressant/<br>anxiolytics/ hypnotics<br>users | Only<br>Antidepressants<br>users | Only Anxiolytics/<br>Hypnotics users | Combination use of<br>antidepressants AND<br>anxiolytics/ hypnotics |
|---------------------------------------------------------------|-------------------------------------------------------|----------------------------------|--------------------------------------|---------------------------------------------------------------------|
| <b>General Characteristics</b>                                |                                                       |                                  |                                      |                                                                     |
| Number of patients (n),<br>(% of total number of<br>patients) | 2589 (97.1)                                           | 51 (1.9)                         | 26 (1.0)                             | 1 ( <1.0%)                                                          |
| Male (%)                                                      | 47.9                                                  | 25.2*                            | 30.8*                                | 0*                                                                  |
| Age (yr)                                                      | 53.4 ± 6.7                                            | 52.0 ± 5.9                       | 52.7 ± 6.4                           | 46.0 ± 0                                                            |
| <b>Socio-Demographic Characteristics</b>                      |                                                       |                                  |                                      |                                                                     |
| Ethnicity(% Caucasian)                                        | 95.9                                                  | 92.2                             | 92.3                                 | 100.0                                                               |
| Education (%)                                                 |                                                       |                                  |                                      |                                                                     |
| Low                                                           | 25.3                                                  | 38.0*                            | 44.0*                                | 0*                                                                  |
| Middle                                                        | 47.5                                                  | 42.0*                            | 40.0*                                | 0*                                                                  |
| High                                                          | 27.2                                                  | 20.0*                            | 16.0*                                | 100*                                                                |
| <b>Medication use</b>                                         |                                                       |                                  |                                      |                                                                     |
| Metformin use (%)                                             | 1.1                                                   | 0                                | 0                                    | 0                                                                   |
| Insulin use (%)                                               | 0.1                                                   | 0                                | 0                                    | 0                                                                   |

\*Significantly different from no antidepressant/ anxiolytics/hypnotics users

**Table S2 Patients' characteristics and prevalence of antidepressants and anxiolytics and/or hypnotics use between the year 2007, 2008, 2009, 2010 and 2012.**

|                                                                  | 2007                    | 2008                    | 2009                    | 2010                    | 2012                    |
|------------------------------------------------------------------|-------------------------|-------------------------|-------------------------|-------------------------|-------------------------|
| Number of patients (n)                                           | 4565                    | 4947                    | 5260                    | 5683                    | 7252                    |
| Male (%)                                                         | 52.0                    | 52.5                    | 52.3                    | 52.7                    | 52.5                    |
| Age (yr)                                                         | 64.9 ± 11.6             | 65.4 ± 11.6             | 65.6 ± 11.7             | 65.6 ± 11.4             | 66.8 ± 11.7             |
| BMI (kg/m <sup>2</sup> )                                         | 30.2 ± 5.5              | 30.2 ± 5.5              | 30.2 ± 5.6              | 30.2 ± 5.5              | 30.1 ± 5.4              |
| HbA1c (mmol/mol)                                                 | 6.8 ± 1.2               | 6.9 ± 1.2               | 6.9 ± 1.0               | 7.0 ± 1.0               | 6.8 ± 1.1               |
| Diabetes duration (yr)                                           | 6.4 ± 6.0<br>(5.0, 6.0) | 6.7 ± 6.1<br>(5.5, 7.0) | 7.0 ± 6.3<br>(6.0, 8.0) | 7.2 ± 6.3<br>(6.0, 8.0) | 8.2 ± 6.6<br>(7.0, 9.0) |
| Education (%)                                                    |                         |                         |                         |                         |                         |
| Low                                                              | 39.4                    | 40.4                    | 41.9                    | 44.5                    | 38.7                    |
| Middle                                                           | 30.4                    | 32.4                    | 34.6                    | 37.2                    | 32.6                    |
| High                                                             | 12.2                    | 13.0                    | 13.6                    | 14.2                    | 12.2                    |
| Missing                                                          | 18.0                    | 14.2                    | 9.9                     | 4.2                     | 16.5                    |
| Only Antidepressants use (%)                                     | 5.4                     | 5.6                     | 6.3                     | 6.8                     | 7.3                     |
| Only Anxiolytics and/or hypnotics use (%)                        | 5.8                     | 6.4                     | 6.0                     | 5.8                     | 6.5                     |
| Combination use (antidepressants and anxiolytics/ hypnotics) (%) | 2.4                     | 2.9                     | 3.1                     | 3.2                     | 3.3                     |
| Diabetes treated with Diet only (%)                              | 16.7                    | 15.4                    | 16.5                    | 16.4                    | 18.5                    |
| Metformin use, number (%)                                        | 60.8                    | 60.7                    | 59.3                    | 59.9                    | 60.0                    |
| Insulin use, number (%)                                          | 22.5                    | 23.9                    | 24.2                    | 23.7                    | 21.5                    |

460 Abbreviation: BMI: body mass index; HbA1c: glycated hemoglobin; SD: standard deviation.

For continuous variables we reported the mean + SD as well as the median and the IQR
